# Supplementary material
Source: publisher site journal article supplement (https://www.dovepress.com/article/488676)
Supplement: Supplementary file 1 [file get_supplementary_file.php]

**TABLE S1 Clinicopathologic characteristics of patient samples**

**included in the present study**

|  |  | **Cohort I** | | | **Cohort II** | | |
| --- | --- | --- | --- | --- | --- | --- | --- |
| **Characteristics** | **level** | **Overall** | **Non-LNM** | **LNM** | **Overall** | **Non-LNM** | **LNM** |
| n |  | 1010 | 429 | 581 | 190 | 82 | 108 |
| SEX (%) | female | 731 (72.4) | 326 (76.0) | 405 (69.7) | 124 (65.3) | 56 (68.3) | 68 (63.0) |
|  | male | 279 (27.6) | 103 (24.0) | 176 (30.3) | 66 (34.7) | 26 (31.7) | 40 (37.0) |
| AGE (median [IQR]) |  | 59.00 [52.00, 65.00] | 58.00 [51.00, 63.00] | 60.00 [53.00, 66.00] | 60.00 [51.25, 66.00] | 59.00 [50.00, 65.75] | 61.00 [52.00, 66.25] |
| PNI (median [IQR]) |  | 51.30 [47.40, 55.50] | 53.20 [49.30, 57.10] | 50.00 [46.30, 53.60] | 49.02 (5.11) | 51.08 (5.03) | 47.46 (4.60) |
| LMR (median [IQR]) |  | 4.18 [3.14, 5.41] | 4.46 [3.52, 5.69] | 3.92 [3.00, 5.17] | 4.35 [3.37, 5.66] | 4.32 [3.29, 6.12] | 4.38 [3.43, 5.39] |
| NLR (median [IQR]) |  | 1.89 [1.39, 2.56] | 1.73 [1.30, 2.31] | 2.01 [1.49, 2.73] | 1.98 [1.42, 2.56] | 1.94 [1.26, 2.33] | 2.01 [1.60, 2.73] |
| PLR (median [IQR]) |  | 123.05 [95.80, 164.48] | 106.40 [85.70, 138.90] | 134.90 [106.20, 181.90] | 132.85 [104.12, 176.50] | 113.05 [91.52, 158.73] | 140.60 [118.57, 186.60] |
| DIR (median [IQR]) |  | 0.58 [0.49, 0.69] | 0.56 [0.48, 0.65] | 0.60 [0.51, 0.72] | 0.49 [0.39, 0.64] | 0.51 [0.39, 0.63] | 0.48 [0.39, 0.65] |
| INI (median [IQR]) |  | 11.20 [5.20, 18.80] | 13.50 [6.30, 20.90] | 10.00 [4.50, 17.40] | 11.60 [4.90, 19.58] | 11.60 [4.70, 19.98] | 11.70 [4.90, 18.32] |
| GLR (median [IQR]) |  | 2.56 [2.07, 3.34] | 2.43 [1.95, 3.05] | 2.67 [2.19, 3.44] | 2.74 [2.16, 3.71] | 2.42 [1.90, 3.63] | 2.96 [2.42, 3.76] |
| FLR (median [IQR]) |  | 1.43 [1.09, 1.93] | 1.25 [0.96, 1.71] | 1.60 [1.22, 2.08] | 1.62 [1.26, 2.17] | 1.46 [1.10, 1.82] | 1.86 [1.48, 2.34] |
| BMI (median [IQR]) |  | 22.80 [20.50, 24.98] | 23.40 [21.10, 25.70] | 22.40 [20.10, 24.30] | 22.33 (2.98) | 22.99 (2.81) | 21.83 (3.02) |
| CD3 (median [IQR]) |  | 68.40 [60.80, 74.00] | 69.00 [61.80, 74.10] | 67.90 [59.60, 73.90] | 68.65 [60.80, 74.10] | 69.50 [59.97, 74.18] | 67.55 [61.92, 73.95] |
| CD4 (mean (SD)) |  | 39.61 (8.85) | 40.80 (8.62) | 38.74 (8.93) | 39.82 (8.22) | 40.12 (8.54) | 39.60 (8.00) |
| CD8 (median [IQR]) |  | 21.70 [16.92, 27.28] | 21.70 [17.10, 26.50] | 21.60 [16.90, 27.80] | 21.20 [16.80, 28.17] | 21.15 [16.80, 27.53] | 21.20 [16.80, 28.35] |
| CD4.CD8 (median [IQR]) |  | 1.82 [1.32, 2.54] | 1.89 [1.38, 2.57] | 1.79 [1.27, 2.51] | 1.85 [1.35, 2.55] | 1.92 [1.36, 2.50] | 1.81 [1.34, 2.65] |
| double.positive.Tcells (median [IQR]) |  | 0.20 [0.10, 0.40] | 0.20 [0.10, 0.40] | 0.20 [0.10, 0.40] | 0.20 [0.10, 0.40] | 0.20 [0.10, 0.50] | 0.20 [0.10, 0.40] |
| CD19 (median [IQR]) |  | 10.20 [7.50, 13.20] | 10.50 [7.80, 13.90] | 10.00 [7.30, 12.80] | 10.20 [8.00, 13.20] | 11.30 [8.40, 13.70] | 9.85 [7.38, 12.50] |
| IGA (median [IQR]) |  | 2.23 [1.63, 2.99] | 2.15 [1.61, 2.88] | 2.27 [1.66, 3.06] | 2.00 [1.44, 2.61] | 2.06 [1.59, 2.71] | 1.93 [1.40, 2.54] |
| IGG (median [IQR]) |  | 11.00 [9.41, 13.10] | 11.30 [9.63, 13.20] | 10.80 [9.21, 12.90] | 10.30 [8.68, 12.40] | 10.55 [8.99, 12.40] | 10.20 [8.41, 12.33] |
| IGM (median [IQR]) |  | 0.86 [0.63, 1.15] | 0.89 [0.66, 1.17] | 0.81 [0.62, 1.13] | 0.90 [0.67, 1.22] | 0.95 [0.70, 1.31] | 0.81 [0.60, 1.15] |
| TRF (median [IQR]) |  | 2.25 [1.93, 2.73] | 2.23 [1.99, 2.70] | 2.28 [1.90, 2.77] | 2.19 [1.85, 2.57] | 2.21 [1.96, 2.49] | 2.14 [1.81, 2.59] |
| KAP (median [IQR]) |  | 8.57 [7.20, 10.40] | 8.62 [7.23, 10.50] | 8.51 [7.18, 10.20] | 8.09 [7.05, 9.74] | 8.41 [7.25, 10.28] | 7.94 [6.97, 9.60] |
| LAM (median [IQR]) |  | 4.50 [3.76, 5.38] | 4.54 [3.79, 5.33] | 4.48 [3.75, 5.44] | 4.69 [3.95, 5.59] | 4.81 [4.11, 5.53] | 4.58 [3.74, 5.66] |
| K.L (median [IQR]) |  | 1.91 [1.68, 2.16] | 1.93 [1.71, 2.16] | 1.88 [1.66, 2.15] | 1.80 [1.55, 2.10] | 1.79 [1.53, 2.04] | 1.80 [1.57, 2.12] |

Table S2 Patient Distribution in 7:3 Random Allocation Groups

| **Characteristics** | **level** | **Overall** | **Training** | **Test** |
| --- | --- | --- | --- | --- |
| n |  | 1010 | 707 | 303 |
| N (%) | negative | 429 (42.5) | 300 (42.4) | 129 (42.6) |
|  | positive | 581 (57.5) | 407 (57.6) | 174 (57.4) |
| SEX (%) | female | 731 (72.4) | 521 (73.7) | 210 (69.3) |
|  | male | 279 (27.6) | 186 (26.3) | 93 (30.7) |
| AGE (median [IQR]) |  | 59.00 [52.00, 65.00] | 59.00 [52.00, 64.00] | 59.00 [52.00, 65.00] |
| PNI (median [IQR]) |  | 51.30 [47.40, 55.50] | 50.80 [47.15, 55.08] | 51.85 [48.00, 56.42] |
| LMR (median [IQR]) |  | 4.18 [3.14, 5.41] | 4.11 [3.07, 5.35] | 4.26 [3.24, 5.56] |
| NLR (median [IQR]) |  | 1.89 [1.39, 2.56] | 1.90 [1.40, 2.58] | 1.84 [1.36, 2.53] |
| PLR (median [IQR]) |  | 123.04 [95.78, 164.48] | 124.08 [97.77, 165.33] | 121.05 [90.35, 163.31] |
| DIR (median [IQR]) |  | 0.58 [0.49, 0.69] | 0.58 [0.49, 0.69] | 0.57 [0.49, 0.69] |
| INI (median [IQR]) |  | 11.23 [5.19, 18.78] | 11.41 [5.24, 19.47] | 10.58 [5.07, 17.46] |
| GLR (median [IQR]) |  | 2.56 [2.07, 3.34] | 2.59 [2.09, 3.36] | 2.50 [1.99, 3.23] |
| FLR (median [IQR]) |  | 1.43 [1.09, 1.93] | 1.44 [1.10, 1.93] | 1.42 [1.06, 1.93] |
| BMI (median [IQR]) |  | 22.84 [20.55, 24.95] | 22.68 [20.47, 24.91] | 23.03 [20.67, 25.08] |
| CD3 (median [IQR]) |  | 68.40 [60.80, 74.00] | 68.90 [61.10, 74.40] | 66.90 [59.95, 73.35] |
| CD4 (mean (SD)) |  | 39.61 (8.85) | 39.81 (8.74) | 39.15 (9.12) |
| CD8 (median [IQR]) |  | 21.70 [16.92, 27.28] | 22.00 [17.20, 27.55] | 20.90 [16.75, 26.55] |
| CD4.CD8 (median [IQR]) |  | 1.82 [1.32, 2.54] | 1.81 [1.30, 2.51] | 1.89 [1.33, 2.55] |
| double.positive.Tcells (median [IQR]) |  | 0.20 [0.10, 0.40] | 0.20 [0.10, 0.40] | 0.20 [0.10, 0.40] |
| CD19 (median [IQR]) |  | 10.20 [7.50, 13.20] | 10.00 [7.40, 12.90] | 10.60 [7.80, 13.85] |
| IGA (median [IQR]) |  | 2.23 [1.63, 2.99] | 2.15 [1.63, 2.90] | 2.33 [1.65, 3.12] |
| IGG (median [IQR]) |  | 11.00 [9.41, 13.10] | 10.90 [9.21, 12.85] | 11.70 [9.98, 13.35] |
| IGM (median [IQR]) |  | 0.86 [0.63, 1.15] | 0.85 [0.62, 1.13] | 0.88 [0.66, 1.19] |
| TRF (median [IQR]) |  | 2.25 [1.93, 2.73] | 2.24 [1.92, 2.73] | 2.29 [1.97, 2.74] |
| KAP (median [IQR]) |  | 8.57 [7.20, 10.40] | 8.46 [7.16, 10.30] | 8.77 [7.44, 10.50] |
| LAM (median [IQR]) |  | 4.50 [3.76, 5.38] | 4.46 [3.74, 5.31] | 4.64 [3.90, 5.57] |
| K.L (median [IQR]) |  | 1.91 [1.68, 2.16] | 1.91 [1.68, 2.17] | 1.89 [1.67, 2.10] |

**Figure S*1**


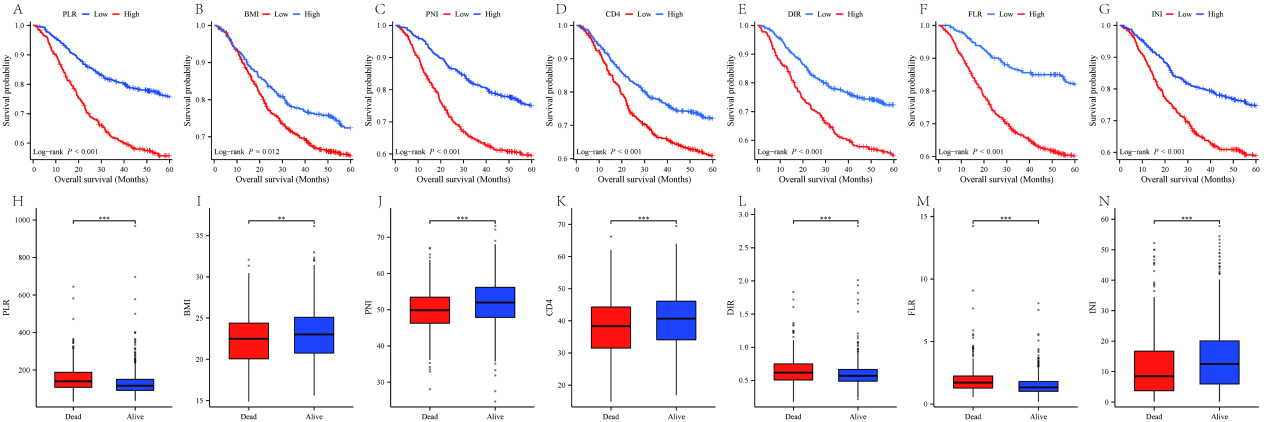


KM curves for high and low groups of each feature (A-G) depicting the relationship between individual features and survival and death (H-N)

**Figure S*2**


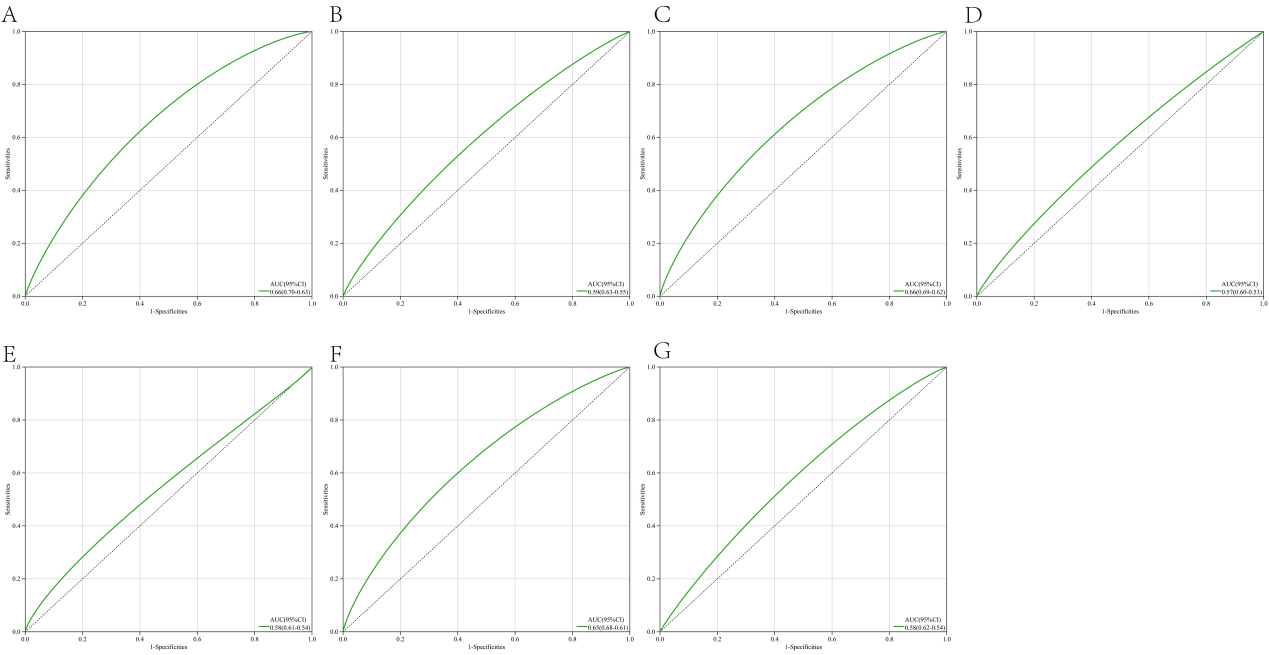


ROC Curve for Lymph Node Prediction Based on Features. (A)PLR, (B)BMI, (C)PNI, (D)CD4, (E)DIR, (F)FLR, (G)INI

**FigureS* 3**


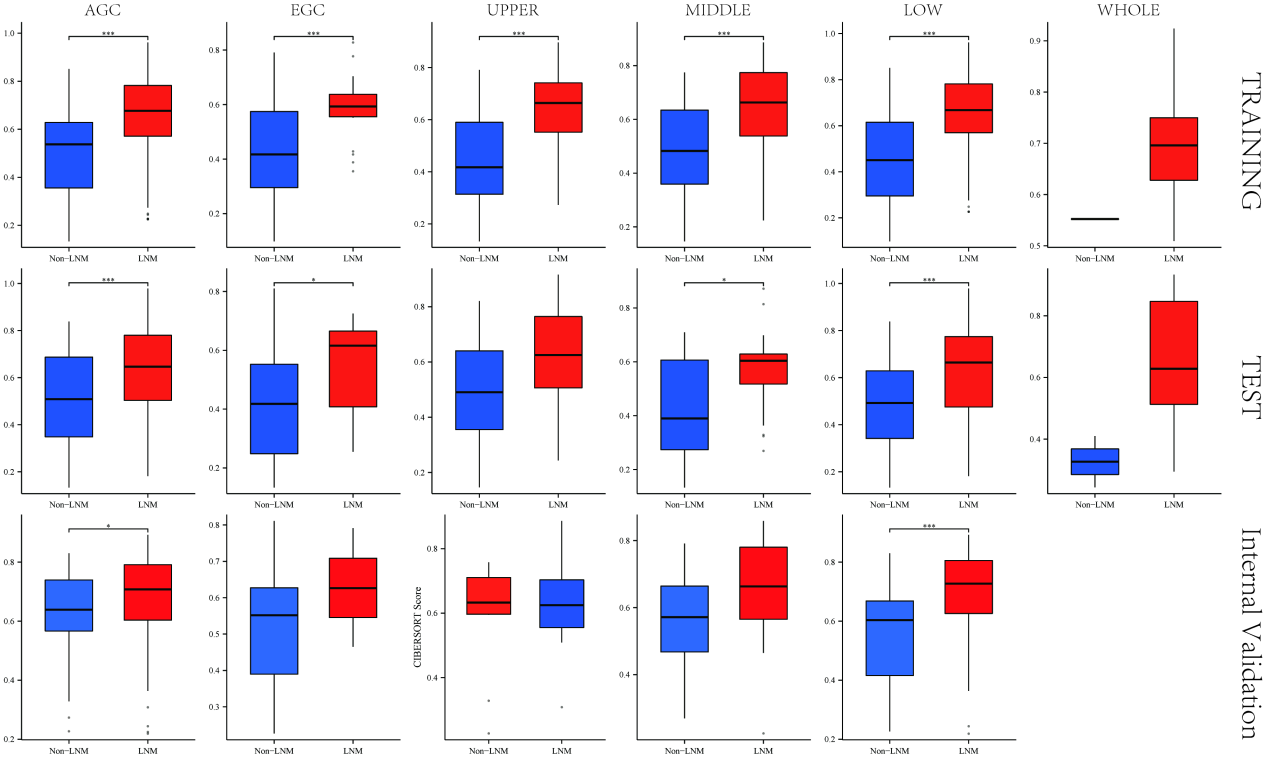


The relationship between XGB scores and lymph node positivity/negativity was examined across various subgroups within the training set, testing set, and internal validation set.

**Figure S*4**


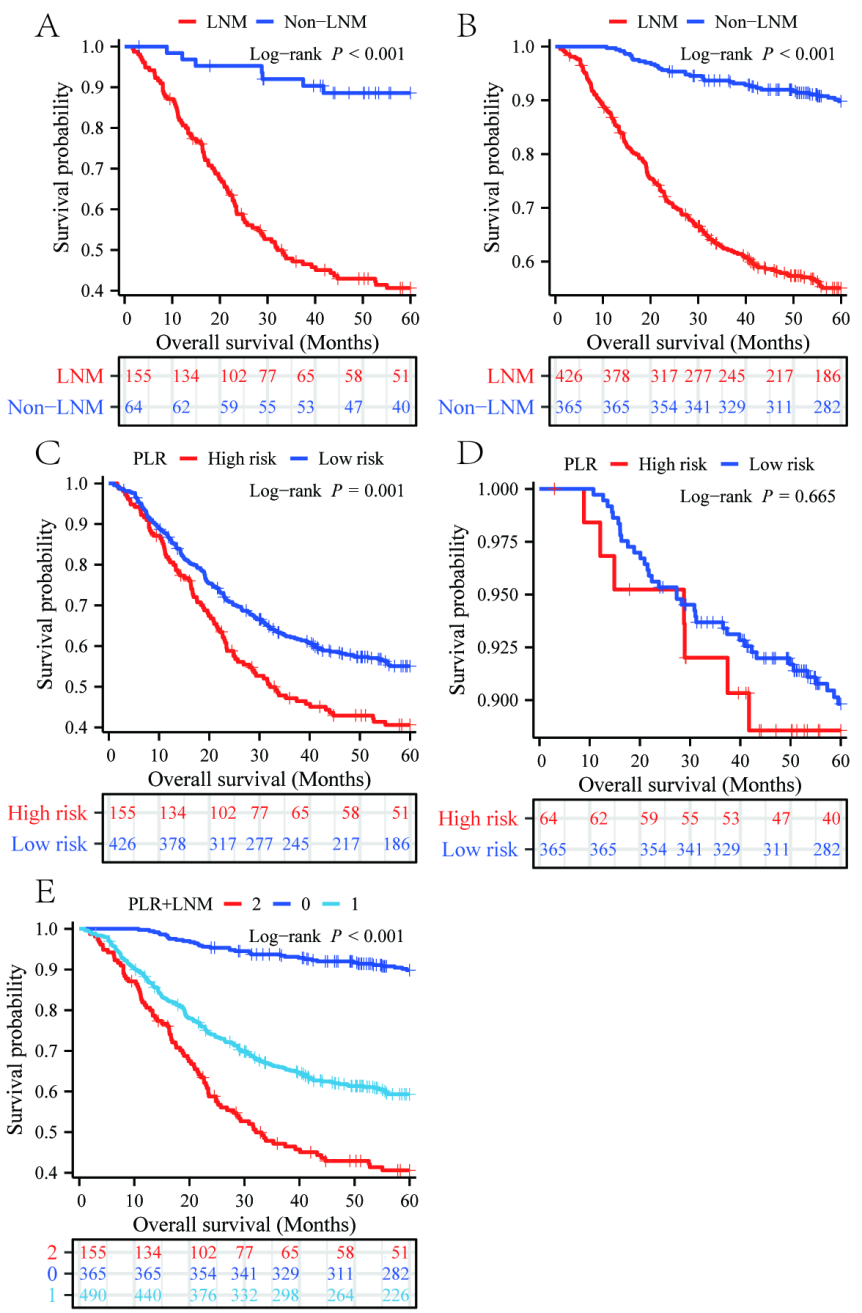


(A) Survival curves for lymph node-positive and lymph node-negative patients with high PLR. (B) Survival curves for lymph node-positive and lymph node-negative patients with low PLR. (C) Survival curves for high PLR and low PLR in lymph node-positive patients. (D) Survival curves for high PLR and low PLR in lymph node-negative patients. (E) Survival curves related to lymph node-PLR for all patients.

**Figure S*5**


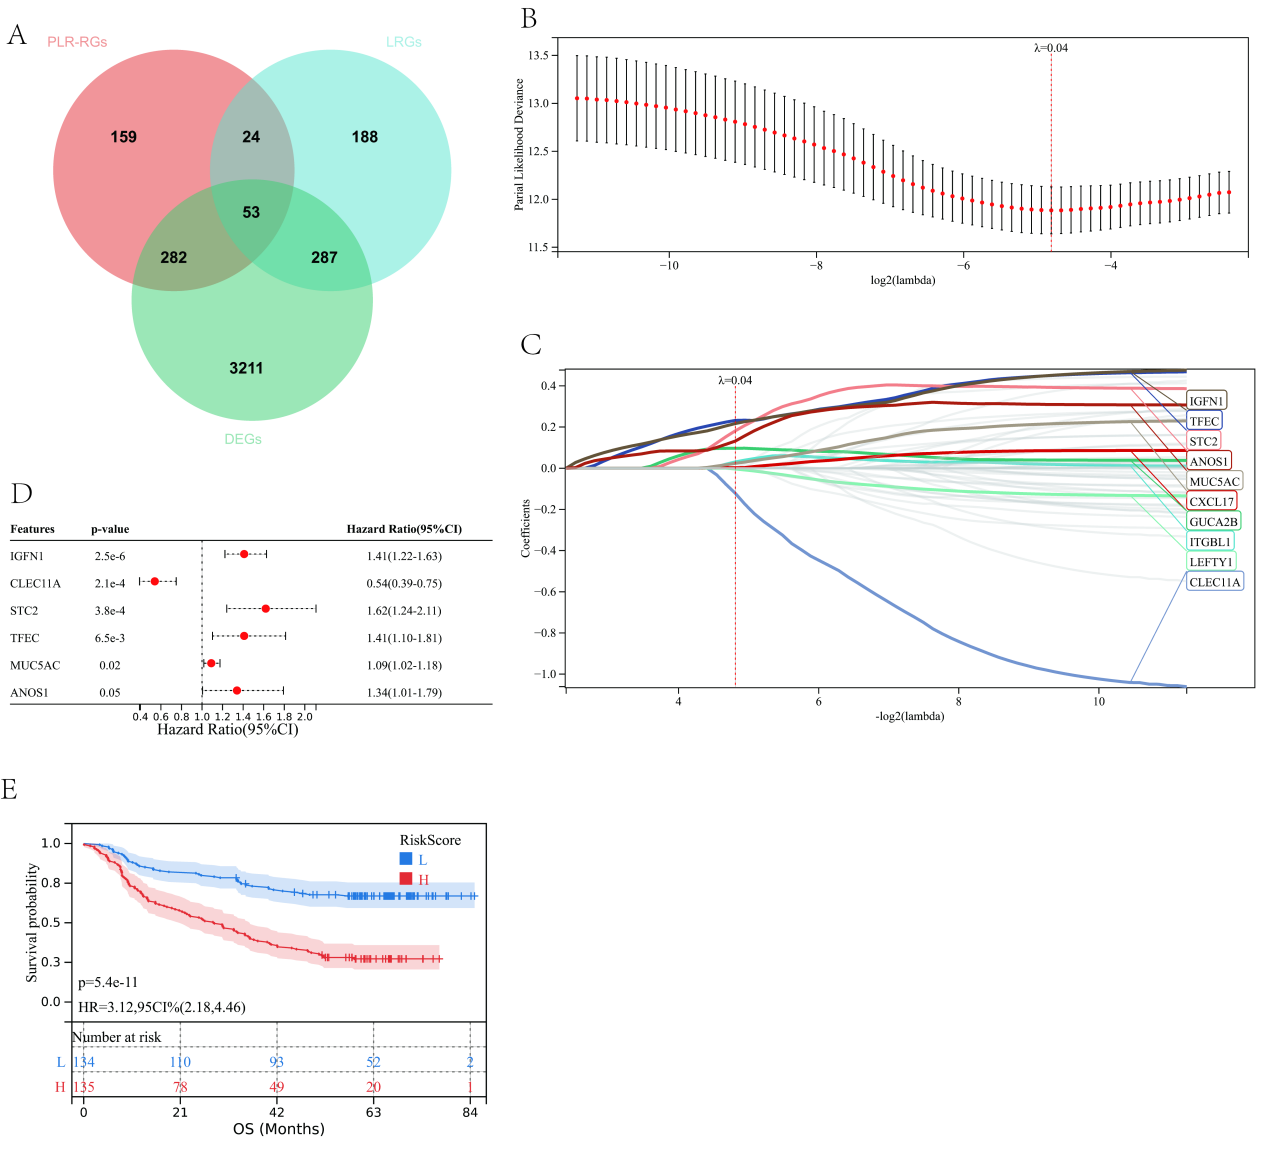


Identification of features associated with CD4. (A) Venn diagram depicts genes correlated with CD4. (B, C) Genes associated with CD4 identified using the LASSO method. (D) Cox proportional hazards analysis determines risk features for CD4. (E) Kaplan-Meier analysis for patients in the high-risk and low-risk score groups.

**Figure S*6**


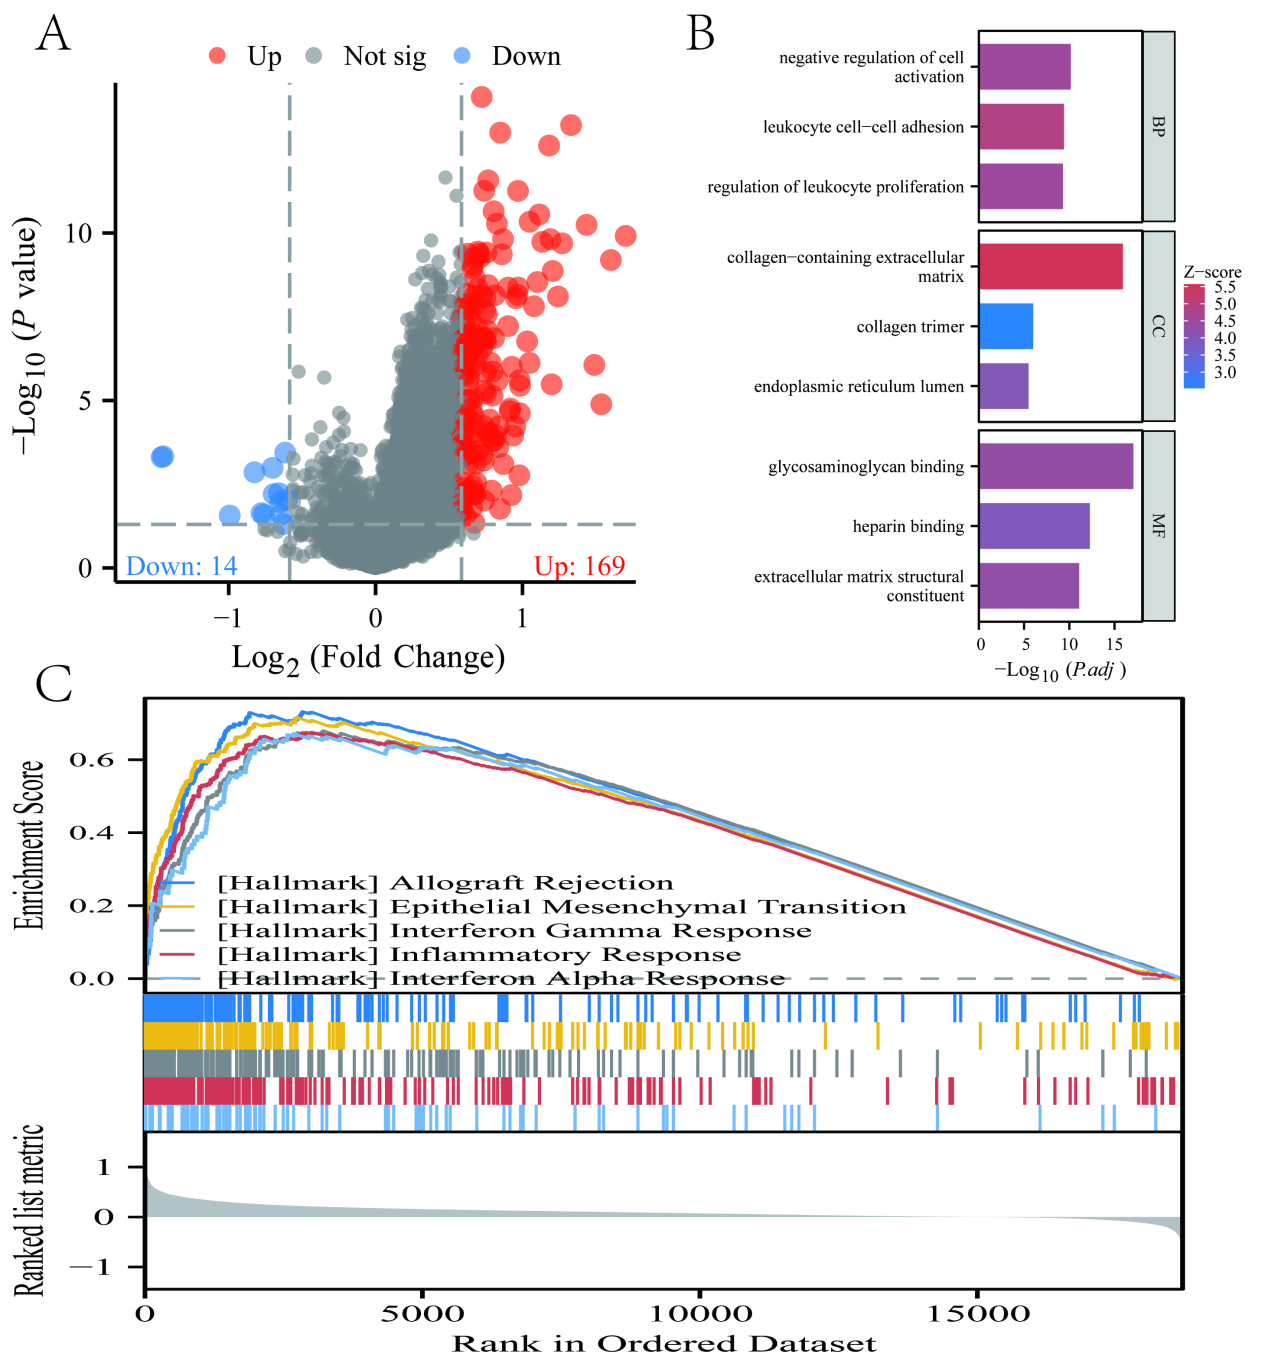


(A) Volcano plot of differentially expressed genes, (B) Enrichment analysis of Biological Process (BP), Molecular Function (MF), and Cellular Component (CC), (C) GSEA pathway enrichment analysis.

**Figure S*7**


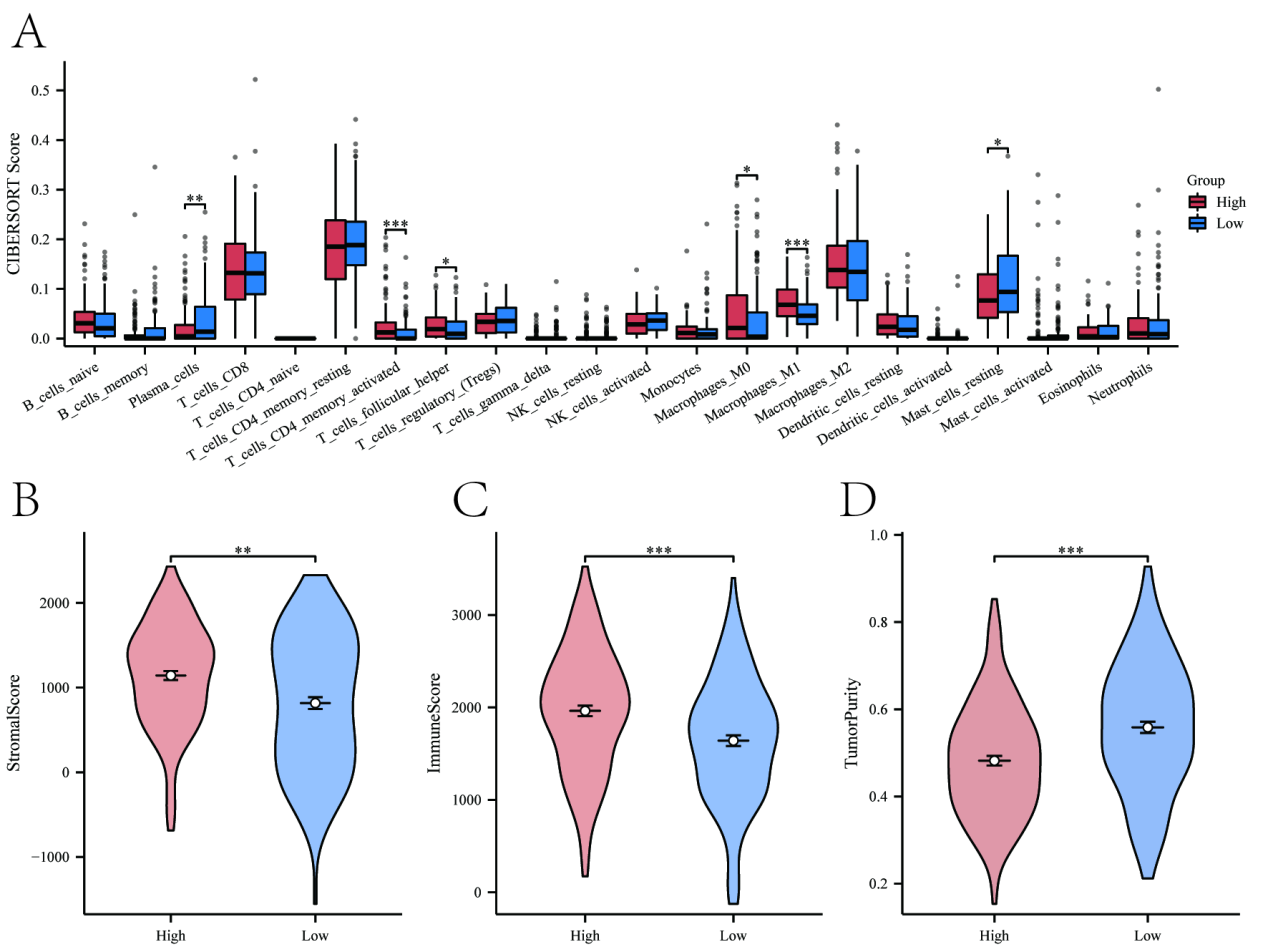


Analysis of immune infiltration(A)， ESTIMATE analysis(B、C、D).（* indicates *p* < 0.05, ** indicates *p* < 0.01, and *** indicates *p* < 0.001.）

**Figure S*8**


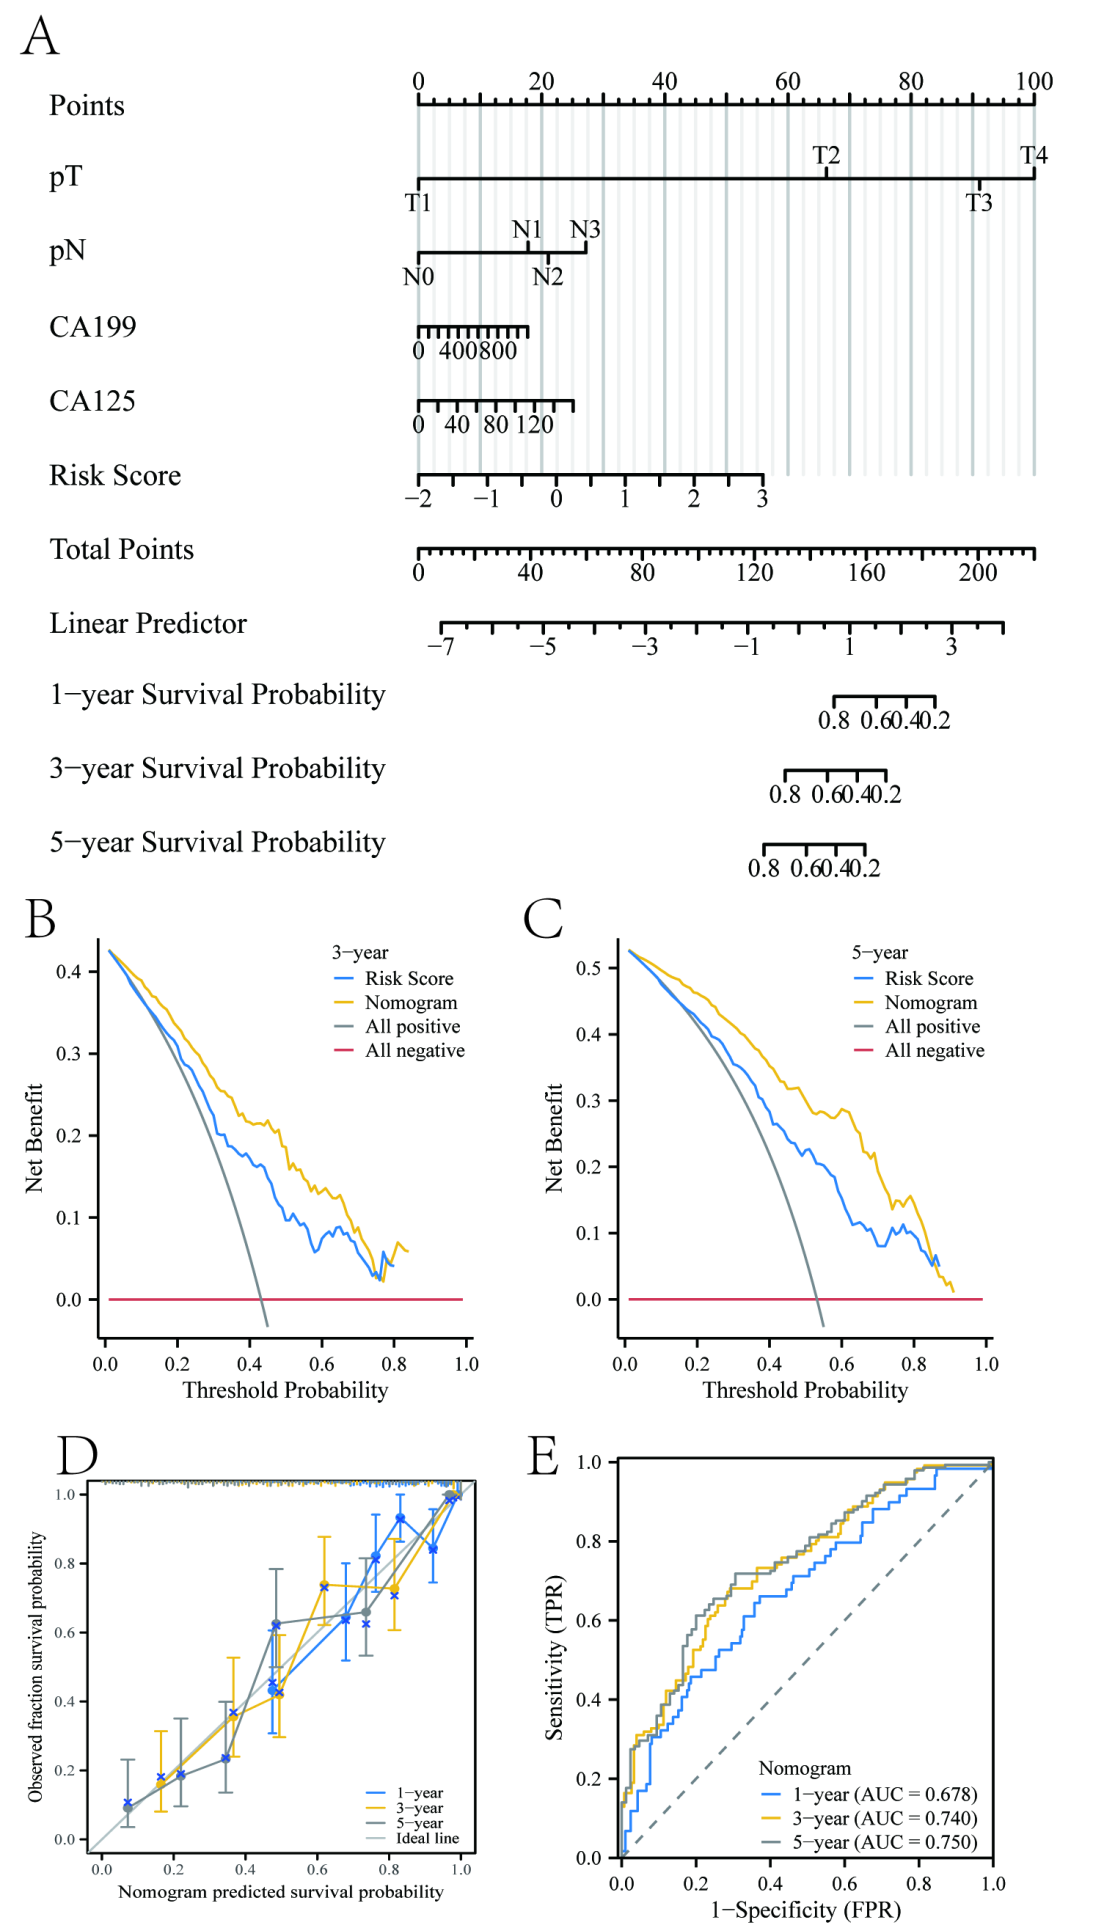


(A) Nomogram predicting the 1-year, 3-year, and 5-year survival probabilities for gastric cancer patients. (B, C) Decision curve analysis for the prognostic risk model. (D) Calibration curve for the Nomogram. (E) AUC values for the Nomogram at 1-year, 3-year, and 5-year intervals.
